1                    ***Pharmacovigilance or patient safety: analysis from a patient safety program***

2    Yira Constanza Cortázar C<sup>1¶</sup>, José Gilberto Orozco D<sup>2¶</sup>, José Julián López G<sup>3¶\*</sup>.

3    <sup>1</sup>Department of Pharmacy, Universidad Nacional de Colombia, Bogotá, Colombia.

4    <sup>2</sup>Faculty of Medicine, Universidad Nacional de Colombia, Bogotá, Colombia.

5    <sup>3</sup>Departament of Pharmacy, Universidad Nacional de Colombia, Bogotá, Colombia.

6    Current adress: Department of Pharmacy, Universidad Nacional de Colombia, Bogotá Colombia.

7    \* Corresponding Author

8    Email: [jjlopezg@unal.edu.co](mailto:jjlopezg@unal.edu.co) (JJLG)

9    ¶ These authors contributed equally to this work.

## 10 **Abstract**

11 **Purpose:** drugs are the common point of pharmacovigilance and patient safety programs. Despite  
12 using a common language, the same epidemiological method and legislation that requires the  
13 operation of the two programs, there does not seem to be a clear relationship between them.

14 **Methodology:** observational descriptive cross sectional study of the reports database from an  
15 institutional patient safety program. Medication errors were classified according to the document  
16 *The Conceptual Framework for the International Classification for Patient Safety (ICPS) WHO*  
17 2009. Adverse Reactions (ADR) were classified according to Uppsala Monitoring Center.

18 **Results:** the omission of drugs or doses was the most frequent error with 42.8% followed by ADRs  
19 (20.9%). No harm incidents corresponded to 61.2% and the remaining 38.8% was represented in near  
20 missincidents and no harm incidents. There were included 41 ADR and 15 therapeutic failures  
21 corresponding to a point-prevalence of 57 ADR/10,000 patients-year and 28.6% (56/196) of reports  
22 related to drugs. Phlebitis is the most frequently reported with 23, 7% followed by hypersensitivity  
23 reactions with 18.4% and excessive neuromuscular blockade with 13.1%.

24 **Conclusions:** considering time, level of care and number of bed, ADR prevalence seem low. A very  
25 important proportion of reports corresponding to near miss incidents or no harm incidents is not taken  
26 into account by the security managers, losing a valuable risk management opportunity in the patient  
27 safety programs.

28 **Keywords:** Pharmacovigilance, Patient Safety, Drug-Related Side Effects and Adverse Reactions,  
29 Medication Errors

## 30 **Introduction**

31 Although by 1848 an attempt had already been made to report adverse drug reaction (ADR)  
32 suspicions because of a young woman died by the administration of chloroform during surgery in  
33 England (1), it was only up to 1960 when the first pharmacovigilance (PV) systems were originated  
34 as a result of the outbreak of phocomelia caused by the administration of thalidomide (2). After this,  
35 a series of articles have been published showing the harm caused by drugs: Talley identified in 1974  
36 that 2,9% of admissions to the medical service were for this cause and 6, 2% of these patients died  
37 (3). Subsequently, Manasse stated that by 1987 drug mortality affected 12,000 Americans and  
38 morbidity reached 15,000 hospitalizations. He also coined the term *Drug misadventuring* to describe  
39 negative drug experiences that he considered a public policy problem derived from the excessive use  
40 of drugs and error-prone preparation and distribution systems (4, 5). Lazarou affirm in 1998 that  
41 ADR were between the fourth and sixth leading cause of death (6).

42 According to the current definition of the World Health Organization (WHO), PV is “the science and  
43 activities relating to the detection, assessment, understanding and prevention of adverse effects or any  
44 other possible drug-related problems...”. (7). By 2012, the national pharmacovigilance program in  
45 Colombia considered that PV should study the problems related with the use of drugs and its effects  
46 in society for preventing and resolving them (8, 9). Today, regulatory agencies work to balance access  
47 to drugs with safety concerns, in line with their mission to protect the public health. However, in the  
48 first years of the 21st century, the safety of prescribed drugs caught the attention of the public because  
49 of some drugs withdrawal, delays in warning the public about important risks and the approval of  
50 drugs without enough attention to safety. (10)

51 Not only ADRs are part of daily concerns of health professionals, there is also interest in others risks  
52 of health care such as nosocomial infections, complications of the clinical course and medication  
53 errors (ME). There have been numerous studies where it was estimated that the incidence rate of  
54 adverse events in Spanish hospitals were 9.3%, 46.6 were considered preventable; 37.4% were related  
55 with medication which 34.8% were preventable. (11).

56 The document *To err is human* identified that about 98,000 people die in a year because of errors in  
57 health care occurring in hospitals. After this document, the WHO in 2004 pointed out to the  
58 governments of the world the need to establish programs that guarantee safe actions in the patient  
59 care and suggests a global strategy to fulfill this purpose (12, 13). Colombia has not been unaware of  
60 this situation and through the Ministry of Social Protection urges institutions to implement and  
61 continuously validate a Patient Safety Program (PSP), which guarantees the best conditions for the  
62 healthcare of Colombian people and for which it has issued specific regulations (14, 15).

63 PSPs in their philosophy extend the approach of safety in patient care and include in their objectives  
64 the inspection of activities related to healthcare, such as skin integrity, prevention of falls, control of  
65 medical devices, and surveillance of blood derivatives, among others. These programs incorporate in  
66 their concept the inherent risk of health care service and part of their analysis includes the evaluation  
67 of the causes of errors or failures in the system that will allow establishing corrective actions in future  
68 risk situations for the patient. IBEAS study identified that a 10.5% of the patients presented an  
69 adverse event and at least half of these adverse events to drugs could be prevent (16).

70 Despite these two programs led by the WHO, the negative consequences for the patients' health are  
71 still far from being controlled or minimized due, among other reasons, to the current biomedical  
72 model that aims to solve health issues with medical interventions, in which drugs are an essential part,  
73 and a neoliberal economy that turned health into a business model (17, 18).

74 One of the common points of PVP and PSP are drugs. Despite the use of common language such as  
75 ADR, ME and the same epidemiological method (risk approach) added to the fact that in Colombian  
76 legislation it is required to have the two programs in order to achieve the certification of institutions  
77 for provision of health services to the population, there seems to be no clear articulation between  
78 them and it has even been identified that there is a significant variability in PVP, which limits the  
79 comparability between different information systems(19). From an institutional PSP, this study

80 characterized the drug related reports sent to the program, identified the differences of their  
81 classification.

## 82 **Materials and methods**

83 An observational descriptive cross sectional study was carried out with a retrospective collection of  
84 information, reports of the institutional PSP application were included during 2015, and there were  
85 excluded duplicate reports, invalid (report presenting any inconsistency), tests (information is  
86 introduced to verify the integrity of the application), related to the infrastructure of the hospital, and  
87 personal complaints. The reports were classified according to the categories established in the  
88 document *The Conceptual Framework for the International Classification for Patient Safety* (ICPS)  
89 of WHO 2009 (20). For the ADR classification, the tools suggested by the Uppsala Monitoring Center  
90 were used, such system/organ affected and seriousness (21).

91 The ethics committee approved the study conforms to the Declaration of Helsinki and resolution  
92 008430 of 1993 according to the specified in the article 11 of chapter I. The present study is a risk-  
93 free investigation therefore written informed consent is not required.

## 94 **Results**

95 According to the database used in the study, 1481 safety cases were reported in 2015. After the  
96 preliminary analysis, 439 (29.6%) reports were discarded, because they fulfilled some excluded  
97 criteria, leaving 1042 total valid reports of which 196 (18.8%) were identified and are related to drugs  
98 and make up the common nucleus between PSP and PVP. Fig 1 shows the process and the results of  
99 the initial evaluation.

101 **Figure 1. Flow diagram of the selection and classification of the reports.** Steps for the selection  
102 of the reports included in the present study. Only those related to medications were included.

103 *PSP: medication errors.*

104 Table 1 shows the distribution of reports according to ICPS, where it can be observed that 42.8%  
105 (84/196) correspond to omission of drugs or dose (category 9), followed by 20.9% (41/196) related  
106 to ADR (category 11). Sixteen reports could not be classified in any category so it was necessary to  
107 create two additional categories: "therapeutic failure" (TF) (category 12) in which 15 reports were  
108 identified, and "unclassifiable" (category 20) corresponding to an event of wrong adjustment.

109 **Table 1. Distribution of errors according to ICPS**

| Error                              | Category | N   | %     |
|------------------------------------|----------|-----|-------|
| Wrong drug                         | 1        | 14  | 7,14  |
| Wrong patient                      | 2        | 3   | 1,53  |
| Wrong dose/strength of frequency   | 3        | 10  | 5,10  |
| Wrong formulation or presentation  | 4        | 4   | 2,04  |
| Wrong route or quantity            | 5        | 1   | 0,51  |
| Wrong Dispensing Label/Instruction | 6        | 8   | 4,08  |
| Contraindication                   | 7        | 2   | 1,02  |
| Wrong storage                      | 8        | 13  | 6,63  |
| Omitted medicine or dose           | 9        | 84  | 42,86 |
| Expired medicine                   | 10       | 0   | 0     |
| Adverse drug reaction              | 11       | 41  | 20,92 |
| Therapeutic failure                | 12       | 15  | 7,65  |
| Not classifiable                   | 20       | 1   | 0,51  |
|                                    | Total    | 196 | 100   |

110 Classification of medication errors according to ICPS. The last two classifications (12 and 20) were  
111 created for the present study.

112

113 Reports were constituted by 61.2% (120/196) of harmful incidents and the remaining 38.8% (76/196)  
114 of the reports were represented near miss incidents and no harm incidents. Harmful incidents were  
115 distributed in ADRs (41/120), TF (15/120) and harm related to surgery delay, additional tests, drug  
116 rupture or harm or strict monitoring (64/120) are included. Of these events, 68% (82/120)  
117 corresponded to moderate harm.

118 *PVP: Adverse drug reactions*

119 There were identified 41 ADRs and 15 TF that correspond to 5.4% (56/1040) of total reports and to  
120 28.6% (56/196) of reports related to drugs. Table 2 shows that the most affected organ-system was  
121 the skin with a 42.8% (24/56), followed by the central nervous system with a 23.2% (13/56)

122 **Table 2. Distribution of ADR according to WHO**

| <b>Drug</b>           | <b>ADR</b>          | <b>Classification</b> | <b>Affected System</b>  | <b>N</b> |
|-----------------------|---------------------|-----------------------|-------------------------|----------|
| Dexmedetomidine       | Agitation, anxiety  | Moderate              | Nervous                 | 1        |
| Rocuronium            | Neuromuscular block | Serious               | Musculoskeletal         | 5        |
| Oxygen                | hypertensive crisis | Serious               | Cardiovascular          | 1        |
| Noradrenaline         | Emesis              | Moderate              | Gastrointestinal        | 1        |
| No medication related | Emesis              | Moderate              | Gastrointestinal        | 2        |
| Haloperidol           | Extrapyramidalism   | Moderate              | Nervous                 | 1        |
| No medication related | Phlebitis           | Moderate              | Skin and its appendages | 11       |
| Polymyxin B           | Phlebitis           | Moderate              | Skin and its appendages | 1        |
| Vancomycin            | Phlebitis           | Moderate              | Skin and its appendages | 2        |

|                            |                           |          |                         |    |
|----------------------------|---------------------------|----------|-------------------------|----|
| Phenytoin                  | Phlebitis                 | Moderate | Skin and its appendages | 1  |
| Insulin glargine           | hypoglycemia              | Moderate | Endocrine               | 1  |
| Prazosin                   | Hypotension               | Moderate | Cardiovascular          | 1  |
| Certolizumab               | Reverse psoriasis         | Moderate | Skin and its appendages | 1  |
| Cefazolin                  | Skin rash                 | Moderate | Skin and its appendages | 1  |
| Dipyrrone                  | Hypersensitivity reaction | Moderate | Skin and its appendages | 1  |
| Phenytoin                  | Hypersensitivity reaction | Moderate | Skin and its appendages | 1  |
| Hyoscine                   | Hypersensitivity reaction | Moderate | Skin and its appendages | 1  |
| Levetiracetam              | Hypersensitivity reaction | Moderate | Skin and its appendages | 1  |
| Morphine                   | Hypersensitivity reaction | Moderate | Skin and its appendages | 1  |
| Piperacillin<br>tazobactam | Hypersensitivity reaction | Moderate | Skin and its appendages | 1  |
| Rituximab                  | Hypersensitivity reaction | Moderate | Skin and its appendages | 1  |
| Heparin                    | Overanticoagulation       | Serious  | Blood                   | 1  |
| Warfarin                   | Overanticoagulation       | Serious  | Blood                   | 3  |
| Midazolam                  | Therapeutic failure       | Moderate | Nervous                 | 6  |
| Dexmedetomidine            | Therapeutic failure       | Moderate | Nervous                 | 1  |
| Fentanyl                   | Therapeutic failure       | Moderate | Nervous                 | 4  |
| Labetalol                  | Therapeutic failure       | Moderate | Cardiovascular          | 4  |
|                            |                           |          | Total                   | 56 |

123 Classification of the ADR according to the Uppsala Monitoring Center, taking into account the  
 124 severity and the affected organ-system

125

126 During the study period, 9900 patients were attended, which shows an incidence of ADR of 0.56%  
 127 (456/9900). According to the organ-system affected, the skin and appendages disorders occupy the



128 first place with 42.8% (24/56) followed by the nervous system with 23.2% (13/56). According to the  
129 seriousness of ADR, most of them were moderate with 82.2% (46/56) and the remaining 17.8%  
130 (10/56) were serious.

131 In the results of the causality analysis with the Naranjo algorithm (68), a score of 7 was obtained in  
132 all cases, with the exception of rocuronium, which was assigned an additional point (+8) because of  
133 the fact that sugammadex was used to reverse the blockade, however, they all go into the PROBABLE  
134 category.

### 135 *Drugs involved in the reports*

136 The drugs classification by anatomical group was carried out according to the Anatomical  
137 Therapeutical Chemic (ATC) classification (22), in which the group of drugs most frequently  
138 involved in the reports were those of the N group with 30.4% (17/56) followed by the group M and  
139 C each with 10.7% (6/56). Other groups with low percentage were L and A. It was necessary to create  
140 "category X" (without specific drug), which corresponds to the report of an event where a problem is  
141 mentioned without specifically describing the international common denomination.

## 142 **Discussion**

143 The present study identified that 1 out of 4 reports were rejected, this can be explained by some of  
144 the following reasons: incomplete socialization of the program, high healthcare burden, high  
145 professionals and students turnover (university hospital). These invalid reports have a negative impact  
146 on the program, because the classification of the reports is done manually and increases the reading  
147 time.

148 Another finding was a higher frequency of incidents reports related with care (70.8%), followed by  
149 those related to drugs (18.8%) and, finally, with medical devices (10.4%). Given that the interest of  
150 this work corresponds to drugs, it can be mentioned that the frequency of reports related to this supply

151 is within the numbers identified in studies such as ENEAS (adverse events in hospitals in Spain, with  
152 37.4%) (11), IBEAS (adverse events in hospitals in Latin America, with 8.23%) (16) and SYREC  
153 (adverse events in Spanish intensive care units, with 24.6%) (23).

154 Regarding the reports classification, it can be affirmed that about half correspond to category 9 of the  
155 ICPS (drugs omission) and another important percentage is related to categories 1 and 7 (inadequate  
156 conservation conditions and wrong medication). These findings may be a reflection of the lack of a  
157 drug distribution system, whose purpose is, precisely, to reduce these errors (24).

158 A study conducted in the hospitalization service of a clinic in Cali (Colombia) identified that in a  
159 period of 20 days the drugs omission was the most common error, although it does not mention which  
160 classification was used (25). Another study conducted by Machado et al. during 8 years in ambulatory  
161 pharmacies in different cities of Colombia identified that most of the errors were related to  
162 dispensation (26). However, it is necessary to emphasize that the comparison of these results with  
163 other studies is complicated by the use of different types of classification and different settings of  
164 study (community, hospital, ambulatory, etc.). For example, a recent report in England identifies the  
165 potentially inappropriate prescription as an error, as well as administration, monitoring and  
166 dispensing errors (27).

167 According to the typology of the reportable events, it is identified that more than half of the reports  
168 correspond to harmful incidents. Regarding the harmful incidents, it is necessary to clarify that from  
169 the perspective of PSP, these harms are not always related to the affectation of human biology (which  
170 in PV would be called ADR), but also include another type of harm that affects other areas of the  
171 person or the health system (surgery delay, intensive monitoring, pharmaceutical product damage,  
172 etc.). The development and consolidation of the program may lead to the predominance of the near  
173 miss incidents report, since they are closer to prevention and constitute the first sign of incidents that  
174 may or not lead to harm. This high proportion of harmful incidents reports may be related to the fact  
175 that people tend to report those events that cause harm, since those that do not bring consequences

176 can be considered "normal", not worthy of notification or a combination of the "seven capital sins of  
177 underreporting", which will be discussed later (28).

178 According to this consideration, it draws attention that a little less than half of these incidents  
179 correspond to ADR and therefore were included in the activities of PVP, while the remaining  
180 percentage of incidents that also caused harm were not considered. Additionally, reports of incidents  
181 that did not cause harm (no harm incidents, near miss incidents) are not analyzed, mainly due to high  
182 workload, which means that an important opportunity to manage the risk is lost, since it should not  
183 wait for it to appear ADR to inform and then analyze. This is one of the most relevant findings of the  
184 present study, since it demonstrates that PV should also deal with errors or infractions in order to be  
185 corrected and prevented. Some authors have identified this need and make a call so that ME are taken  
186 into account in PVP (29, 30). It is therefore necessary to visualize these findings as an opportunity  
187 for improvement, first identifying that the scope of the two programs pose as a challenge the non-  
188 duplicity of efforts, and, as an opportunity, not leaving problems unattended, specifically the near  
189 miss incidents and no harm incidents.

190 In the referenced studies, it was not possible to identify the results in terms of no harm incidents or  
191 near miss-incidents. Some of them describe the results in terms of ADR or ME without taking into  
192 account the infractions and other reportable events mentioned at the beginning of the paragraph. It is  
193 not possible to make a direct comparison with other studies related to the subject for the following  
194 reasons: equal or very similar terms to refer different things (adverse event in PV vs. adverse event  
195 in PS); different terms to refer the same (adverse event or preventable ADR in PV vs. ME in PS);  
196 lack of knowledge by PV programs that only look at ADR and, finally, some discrepancies in the  
197 harmonization of terms used in the Colombian regulation vs. WHO (incident related to patient safety  
198 according to WHO 2009 and incident according to Minprotection 2008 and 2009).

199 In relation to the PVP and according to the institutional application, a 0.56% prevalence of ADR was  
200 estimated during a year, a number that seems low for a fourth-level hospital with 223 hospital beds

201 and 9900 inpatients in the different services during a year, if it is considered that the studies indicate  
202 that in this type of hospitals it is presented between 10 to 20% of ADR, of which between a 10 to  
203 20% are classified serious and the 0.5 to 0.9%% are mortal (11, 16). The results of the present study  
204 may also be related to underreporting, one of the main problems of passive pharmacovigilance (31).  
205 A document prepared by Varallos et al. explains that this, under report, occurs for what has been  
206 called "the seven capital sins of underreporting": 1) consider that serious ADR are well documented,  
207 2) fear of being involved in legal proceedings, 3) guilty feeling for have been responsible for the harm  
208 to the patient, 4) ambition of a group for publish serious cases, 5) lack of knowledge about how to  
209 make the notification, 6) insecurity about the report of ADR and, 7) indifference, lack of interest, time  
210 or another excuse to postpone notification. The main causes of ADR underreporting found in the  
211 studies included in a systematic review were ignorance and insecurity, findings related to the low  
212 knowledge of professionals on the activities of drugs safety analysis; the authors propose that  
213 professional notifications can be promoted through educational interventions aimed to clarify their  
214 importance (28). For the present study, this could also be the cause of poor registration in the  
215 institutional application and invalid reports.

216 The drugs involved in the reports differ from the results found by Machado et al. in Colombia (32-  
217 33), De las Salas et al. in two pediatric hospitals for 6 months (34), Moscoso et al. in a second-level  
218 hospital in Bogotá for 3 months (35) and a study by Chaves in 31 second-level institutions in the city  
219 of Bogotá for a year (36), where antibiotics are among the drugs that report the most ADR, although  
220 they agree that the skin it is the most affected organ-system. Although some similarities are found in  
221 the afore mentioned, differences are also found in some of the results, this can be explained by the  
222 type of institution and the methodology used for the identification (passive vs. active).

223 Despite the wide dissemination and published studies related to patient safety, no similar studies were  
224 found in the bibliographic review carried out for this study that attempted to reflect on the articulation  
225 of PV and PS programs in specific hospitals. However, documents such as the one written by the

226 WHO in 2014 and the EMA in 2015 allow us to deduce that studying the real articulation of these  
227 programs is at the heart of the PV and PS programs (29, 37). For almost 20 years, several authors  
228 have discussed the need for a change in the scope, approach or methods used to perform PV. It is  
229 possible that these findings are the result of the movement on patient safety or of society's need to  
230 counteract the growing outbreak of drug-induced iatrogenic (38-44).

231 There is a need to broaden the vision of health surveillance systems to include aspects such as drug-  
232 related problems, ME and ADR. It has not yet been possible to integrate and incorporate these terms  
233 into a single program, perhaps for reasons that range from the purely philosophical, to a predominance  
234 of positivism, passing through political and economic causes whose analysis goes beyond the scope  
235 of this research (45-47).

## 236 **Acknowledgments**

237 The authors thank Universidad Nacional de Colombia

## 238 **References**

- 239 1. Routledge P. 150 years of pharmacovigilance. *Lancet*. 1998; 351(9110):1200-1.
- 240 2. Strom BL. *What is Pharmacoepidemiology?* In: Brian L. Strom SEK, Sean Hennessy, editor.  
241 *Pharmacoepidemiology*. 5th ed. Chichester, UK: John Wiley & Sons, Ltd; 2012.
- 242 3. Talley RB, Laventurier MF. Drug-induced illness. *JAMA*. 1974;229(8):1043-.
- 243 4. Manasse H. Medication use in an imperfect world: Drug misadventuring as an issue of public  
244 policy part 1. *Am J Hosp Phar*. 1989;46(1):929-44.
- 245 5. Manasse H. Medication use in an imperfect world: Drug misadventuring as an issue of public  
246 policy part 2. *AM J Hosp Pharm*. 1989;46(1):1141-52.
- 247 6. Lazarou J, Pomeranz BH, Corey PN. Incidence of adverse drug reactions in hospitalized patients:  
248 a meta-analysis of prospective studies. *JAMA*. 1998;279(15):1200-5.

- 249 7. The importance of pharmacovigilance Safety Monitoring of medicinal products. World Health  
250 Organization 2002.
- 251 8. Angulo N, Jiménez F, Valcárcel R, Vaca C, Orozco J, López J. *Conceptos básicos en*  
252 *farmacovigilancia. Boletín de farmacovigilancia (suplemento)* [Internet]. 2006; (3):[1-7 pp.].
- 253 9. Angulo N, Jiménez F, Valcárcel R, Vaca C, Orozco J, López J. *Conceptos básicos en*  
254 *farmacovigilancia I. Boletín de farmacovigilancia* [Internet]. 2006; (4):[1-10 pp.].
- 255 10. Baciú A, Stratton K. *The Future of Drug Safety: Promoting and Protecting the Health of the*  
256 *Public*. Washington (USA): Committee on the Assessment of the US Drug Safety System; 2006.
- 257 11. Aranaz Andrés JM, Aibar Remón C, Vitaller Burillo J. *Estudio Nacional sobre los Efectos*  
258 *Adversos ligados a la Hospitalización*. ENEAS 2005 Madrid, España: Ministerio de Sanidad  
259 y Consumo; 2006. Available from:  
260 [https://www.msssi.gob.es/organizacion/sns/planCalidadSNS/pdf/excelencia/opsc\\_sp2.pdf](https://www.msssi.gob.es/organizacion/sns/planCalidadSNS/pdf/excelencia/opsc_sp2.pdf).
- 261 12. Institute of Medicine Committee on Quality of Health Care in A. To err is human. In: Kohn LT,  
262 Corrigan JM, Donaldson MS, editors. *To Err is Human: Building a Safer Health System*.  
263 Washington (DC): National Academies Press (US); 2000.
- 264 13. Organización Mundial de la Salud. *Alianza Mundial para la Seguridad del Paciente: La*  
265 *investigación en seguridad del paciente*. París (Francia); 2008. [Available from:  
266 [http://www.who.int/patientsafety/information\\_centre/documents/ps\\_research\\_brochure\\_es.pdf](http://www.who.int/patientsafety/information_centre/documents/ps_research_brochure_es.pdf)]
- 267 14. Ministerio de salud y protección social. *Seguridad del paciente y la atención segura. Bogotá*  
268 *(Colombia)*; 2014 [Available from:  
269 [https://www.minsalud.gov.co/sites/rid/Lists/BibliotecaDigital/RIDE/DE/CA/Guia-buenas-](https://www.minsalud.gov.co/sites/rid/Lists/BibliotecaDigital/RIDE/DE/CA/Guia-buenas-practicas-seguridad-paciente.pdf)  
270 [practicas-seguridad-paciente.pdf](https://www.minsalud.gov.co/sites/rid/Lists/BibliotecaDigital/RIDE/DE/CA/Guia-buenas-practicas-seguridad-paciente.pdf).]
- 271 15. Ministerio de salud y protección social. *Sistema Único de Acreditación Bogotá (Colombia)*; 2014  
272 [Available from: [https://www.minsalud.gov.co/salud/PServicios/Paginas/sistema-unico-](https://www.minsalud.gov.co/salud/PServicios/Paginas/sistema-unico-acreditacion-sistemaobligatorio-garantia-calidad.aspx)  
273 [acreditacion-sistemaobligatorio-garantia-calidad.aspx](https://www.minsalud.gov.co/salud/PServicios/Paginas/sistema-unico-acreditacion-sistemaobligatorio-garantia-calidad.aspx).]

- 274 16. Aranaz-Andrés J, Aibar-Remón C, Limón-Ramírez R, Amarilla A, Restrepo FR, Urroz O, et al.  
275 Prevalence of adverse events in the hospitals of five Latin American countries: results of the  
276 'Iberoamerican study of adverse events' (IBEAS). *BMJ Qual Saf.* 2011;20(1):1043-51.
- 277 17. Velasco- Rico J. Neoliberalismo, salud pública y atención primaria: Las contradicciones en el  
278 paradigma de salud para todos. *Colombia Med.* 1997;28(1):27-33.
- 279 18. Menendez EL. *Modelo Médico Hegemónico: Reproducción técnica y cultural.* Natura  
280 Medicatrix. 1998;51(1):17-22.
- 281 19. Bailey C, Peddie D, Wickham ME, Badke K, Small SS, Doyle-Waters MM, et al. Adverse drug  
282 event reporting systems: a systematic review. *Br J Clin Pharmacol.* 2016;82(1):17-29.
- 283 20. World Health Organization. *Marco Conceptual de la Clasificación Internacional para la*  
284 *Seguridad del Paciente.* Ginebra (Suiza): Organización Mundial de la Salud; 2009. [Available  
285 from: [http://www.who.int/patientsafety/implementation/icps/icps\\_full\\_report\\_es.pdf](http://www.who.int/patientsafety/implementation/icps/icps_full_report_es.pdf). ]
- 286 21. World Health Organization. *The WHO Programme for International Drug Monitoring Uppsala:*  
287 World Health Organization; 2017 [Available from:  
288 [http://www.who.int/medicines/regulation/medicines-safety/about/drug\\_monitoring\\_prog/en/](http://www.who.int/medicines/regulation/medicines-safety/about/drug_monitoring_prog/en/).
- 289 22. ATC/DDD Index 2014 Norwegian: *WHO Collaborating Centre for Drug Statistics*  
290 *Methodology*; 2018 [Available from: [https://www.whocc.no/atc\\_ddd\\_index/](https://www.whocc.no/atc_ddd_index/)]
- 291 23. Ministerio de Sanidad, Política Social e Igualdad. *Incidentes y eventos adversos en medicina*  
292 *intensiva. Seguridad y riesgo en el enfermo crítico.* SYREC 2007. Madrid, España: Ministerio de  
293 Sanidad, Política Social e Igualdad: 2010 [302]. [Available from:  
294 <https://www.seguridaddelpaciente.es/resources/documentos/syrec.pdf>.]
- 295 24. Napal V, M. G, Ferrándiz JR. *Dispensación con intervención previa del Farmacéutico: dosis*  
296 *unitarias.* 2002 [cited enero 10 de 2018]. In: FARMACIA HOSPITALARIA - TOMO I  
297 [Internet]. España: Sociedad Española de Farmacia Hospitalaria, [cited enero 10 de 2018]; [390-  
298 414]. Available from: <https://www.sefh.es/bibliotecavirtual/fhtomo1/cap2611.pdf>.

- 299 25. Castro-Espinosa J. Frecuencia y caracterización de los errores de medicación en un servicio de  
300 hospitalización de una clínica en Cali, Colombia. *Rev colomb cienc quim farm.* 2013;42(1):5-18.
- 301 26. Machado-Alba JE, Londoño-Builes MJ, Echeverri-Cataño LF, Ochoa-Orozco SA. Adverse drug  
302 reactions in Colombian patients, 2007-2013: Analysis of population databases. *Biomedica*  
303 2016;36(1):59-66.
- 304 27. Elliott RA, Camacho EI, Campbell F, Jankovic D, Martyn St James M, Kaltenthaler E, et al.  
305 *Prevalence and economic burden of medication errors in the NHS in England.* Inglaterra:  
306 Manchester Centre for Health Economics; 2018.
- 307 28. Varallo FR, Guimaraes Sde O, Abjaude SA, Mastroianni Pde C. [Causes for the underreporting  
308 of adverse drug events by health professionals: a systematic review]. *Rev Esc Enferm USP.*  
309 2014;48(4):739-47.
- 310 29. Pharmacovigilance Risk Assessment Committee. *Good practice guide on recording, coding,*  
311 *reporting and assessment of medication errors:* European Medicines Agency; 2015 [Available  
312 from:  
313 [http://www.ema.europa.eu/docs/en\\_GB/document\\_library/Regulatory\\_and\\_procedural\\_guidelin](http://www.ema.europa.eu/docs/en_GB/document_library/Regulatory_and_procedural_guideline/2015/11/WC500196979.pdf)  
314 [e/2015/11/WC500196979.pdf.](http://www.ema.europa.eu/docs/en_GB/document_library/Regulatory_and_procedural_guideline/2015/11/WC500196979.pdf)]
- 315 30. Edwards IR. A New Erice Report Considering the Safety of Medicines in the 21st Century. *Drug*  
316 *Saf* 2017;40(10):845-9.
- 317 31. Organización Panamericana de la Salud. Buenas Prácticas de Farmacovigilancia. Washington, D.  
318 C. (USA): Organización Panamericana de la Salud; 2011
- 319 32. Machado-Alba JE, Giraldo-Giraldo C, Moncada-Escobar JC. Farmacovigilancia activa en  
320 pacientes afiliados al sistema general de seguridad social en salud. *Rev Salud Pública.* 2010;12  
321 (4):580-8
- 322 33. Machado-Alba JE, Moncada JC, Moreno-Gutiérrez PA. Medication errors in outpatient care in  
323 Colombia, 2005-2013. *Biomédica.* 2016;36:251-7.



- 324 34. de las Salas R, Díaz-Agudelo D, Burgos-Flórez FJ, Vaca C, Serrano-Meriño DV. Adverse drug  
325 reactions in hospitalized Colombian children. *Colombia Médica* : CM. 2016;47(3):142-7.
- 326 35. Moscoso-Veloza SM, Ramírez-Cubillos GF, López-Gutiérrez JJ, Gerena-Useche BE. Reacciones  
327 Adversas a Medicamentos en el Hospital de Suba de Bogotá. *Revista de Salud Pública*.  
328 2006;8:209-17.
- 329 36. Chaves M. Caracterización de reacciones adversas a medicamentos en adultos mayores de 44  
330 años en Bogotá, D.C., enero a diciembre, 2012. *Biomédica*. 2015;35:34-42.
- 331 37. WHO. *Reporting and learning systems for medication errors: the role of pharmacovigilance*  
332 *centres*. Switzerland: World Health Organization; 2014.
- 333 38. Orozco J. *De la farmacovigilancia al monitoreo crítico de los medicamentos: El proceso de*  
334 *registro de medicamentos en Colombia*. (Tesis doctorado en salud pública). Universidad  
335 Nacional, Bogotá, Colombia; 2012.
- 336 39. De-Abajo FJ. El medicamento como solución y como problema para la salud pública. una breve  
337 incursión a los objetivos de la farmacoepidemiología. *Rev Esp Salud Pública*. 2001;75(4):281-4.
- 338 40. Laporte JR. Fifty years of pharmacovigilance - Medicines safety and public health.  
339 *Pharmacoepidemiol Drug Saf*. 2016;25(6):725-32.
- 340 41. Caster O, Edwards I. Reflections on attribution and decisions in pharmacovigilance. *Drug Saf*  
341 2010 Oct 1;33(10):805-9. 2010;33(10):805-9.
- 342 42. Edwards RI. Causality Assessment in Pharmacovigilance: Still a Challenge. *Drug Saf*  
343 2017;40(5):365-72
- 344 43. Gervas J. *El fracaso programado de la farmacovigilancia. A propósito del “escándalo*  
345 *Depakine”*: hay culpables y no son los médicos. España. 2018 [Available from:  
346 [http://www.nogracias.eu/2018/03/19/fracaso-programado-la-farmacovigilancia-proposito-del-](http://www.nogracias.eu/2018/03/19/fracaso-programado-la-farmacovigilancia-proposito-del-escandalo-depakine-culpables-no-los-medicos)  
347 [escandalo-depakine-culpables-no-los-medicos.](http://www.nogracias.eu/2018/03/19/fracaso-programado-la-farmacovigilancia-proposito-del-escandalo-depakine-culpables-no-los-medicos)]
- 348 44. Price J. Pharmacovigilance in Crisis: Drug Safety at a Crossroads. *Clin Ther*. 2018;S0149-  
349 2918(18):30088-2.

- 350 45. Morin E. Epistemología de la complejidad. *Gazeta de Antropología*. 2004;20:1-13.
- 351 46. Ugalde A, Homedes N. Las reformas neoliberales del sector de la salud: déficit gerencial y  
352 alienación del recurso humano en América Latina. *Revista Panamericana de Salud Pública*.  
353 2005;17:202-9.
- 354 47. Illich I. *Némesis médica: La expropiación de la salud*. Primera edición ed. España: Barral  
355 editores; 1975. 218 p.

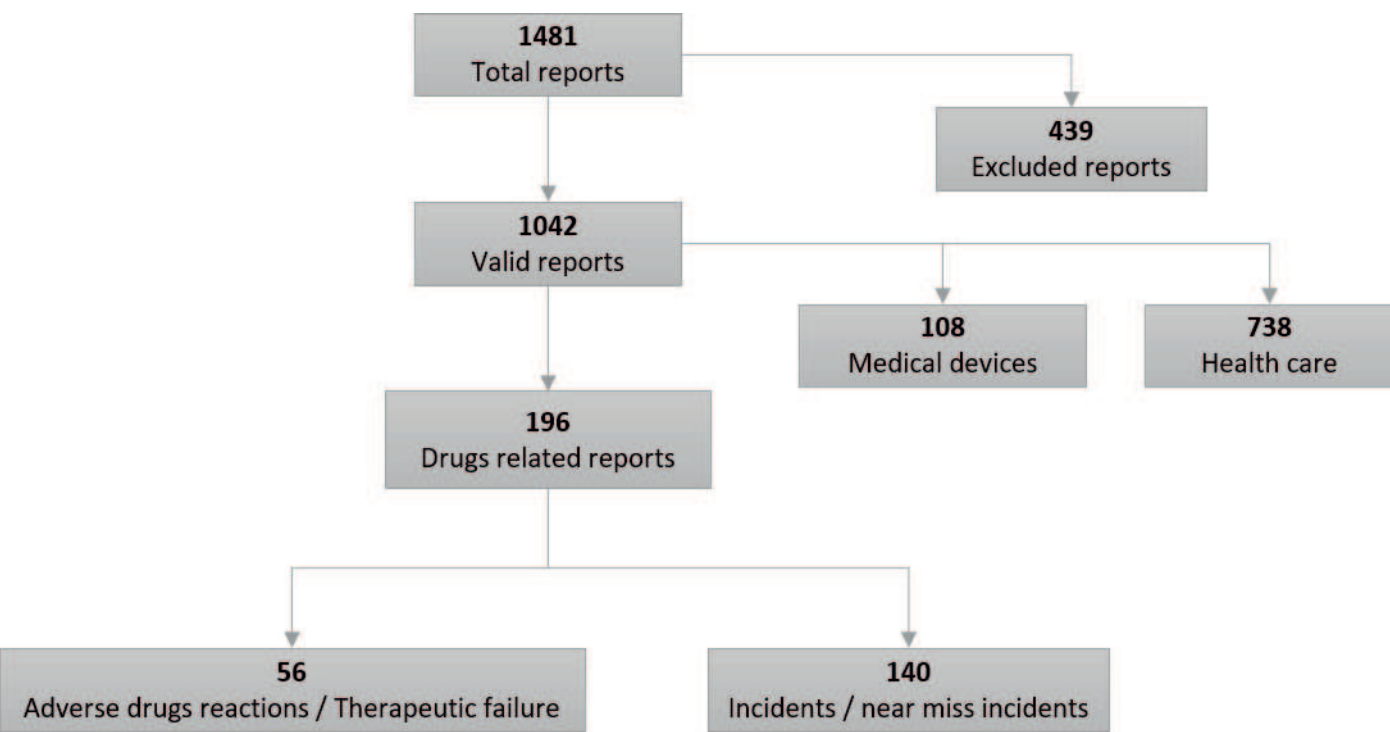

Source: https://www.biorxiv.org/content/10.1101/399923v1.full.pdf
